# Supplementary material for: Respiratory Epithelial Cells Respond to Lactobacillus plantarum but Provide No Cross-Protection against Virus-Induced Inflammation
Source: MDPI journal article supplement (doi:10.3390/v13010002), 2020-12-22
Supplement: s1 [file s1]

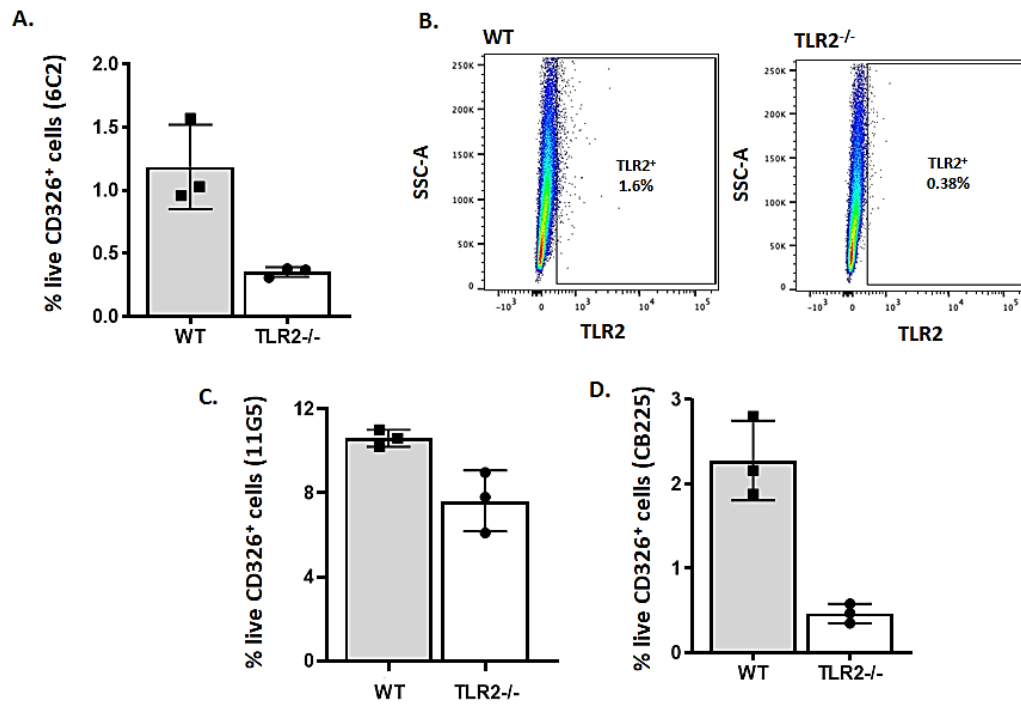

**Suppl. Fig. 1. Further efforts to detect TLR2 expression in mTECs.**

Expression of TLR2 was evaluated further by flow cytometry using multiple anti-TLR2 antibody clones and mTEC cultures prepared from both WT and *Tlr2*<sup>-/-</sup> mice. **(a)** Percentage live CD326<sup>+</sup> cells detected with the anti-TLR2 clone, 6C2 (see also Figure 3). **(b)** Flow plots documenting sample results as shown in (a), **(c)** Percentage of live CD326<sup>+</sup> cells detected with the anti-TLR2 clone, 11G5. **(d)** Percentage of live CD326<sup>+</sup> cells detected with the anti-TLR2 clone CB225.
